# Supplementary material for: Role of Polyamines in the Response to Salt Stress of Tomato
Source: MDPI journal article supplement (doi:10.3390/plants12091855), 2023-04-30
Supplement: s1 [file s1]

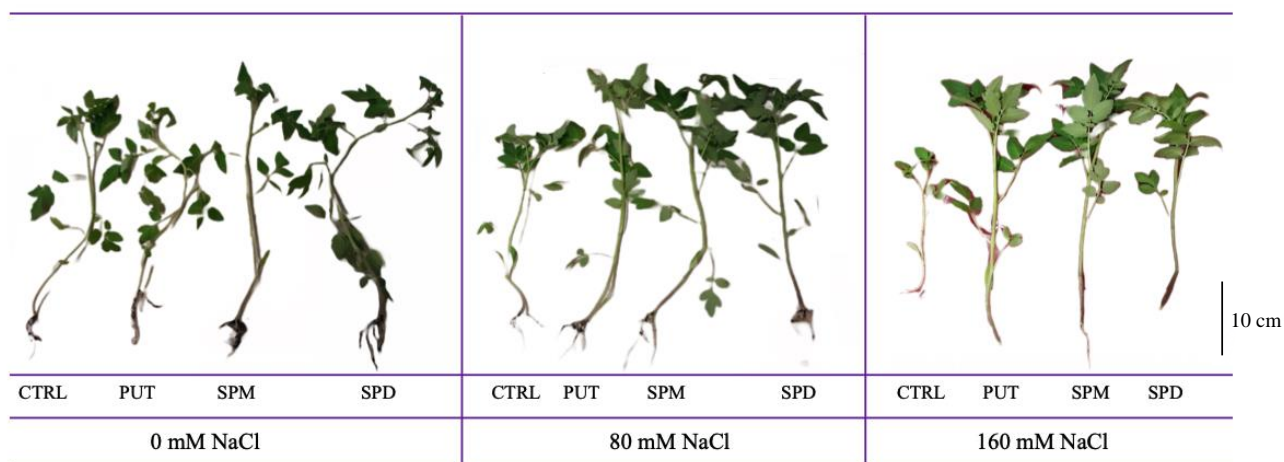

**Figure S1.** Seedlings of tomato developed from seeds, primed according to Materials and Methods with PAs and stored at +4 °C for 12 months. Germinated seeds were sown in non-saline soil and acclimated for 14 days, after this period the plants were subjected to the same irrigation regime described in Section 4.2 of Materials and Methods. CTRL = control; PUT = putrescine; SPM = spermine; SPD = spermidine.
